# Supplementary material for: Structural basis of transcription reduction by a promoter-proximal +1 nucleosome
Source: PubMed Central journal article supplement — Mol Cell. 2023 Jun 1;83(11):1798–1809.e7. doi: 10.1016/j.molcel.2023.04.011 (PMC10237034; doi:10.1016/j.molcel.2023.04.011), 2023-06-01
Supplement: mmc1.pdf [file mmc1.pdf]

**Molecular Cell, Volume 83**

**Supplemental information**

**Structural basis of transcription reduction  
by a promoter-proximal +1 nucleosome**

**Julio Abril-Garrido, Christian Dienemann, Frauke Grabbe, Taras Velychko, Michael Lidschreiber, Haibo Wang, and Patrick Cramer**

Supplemental information

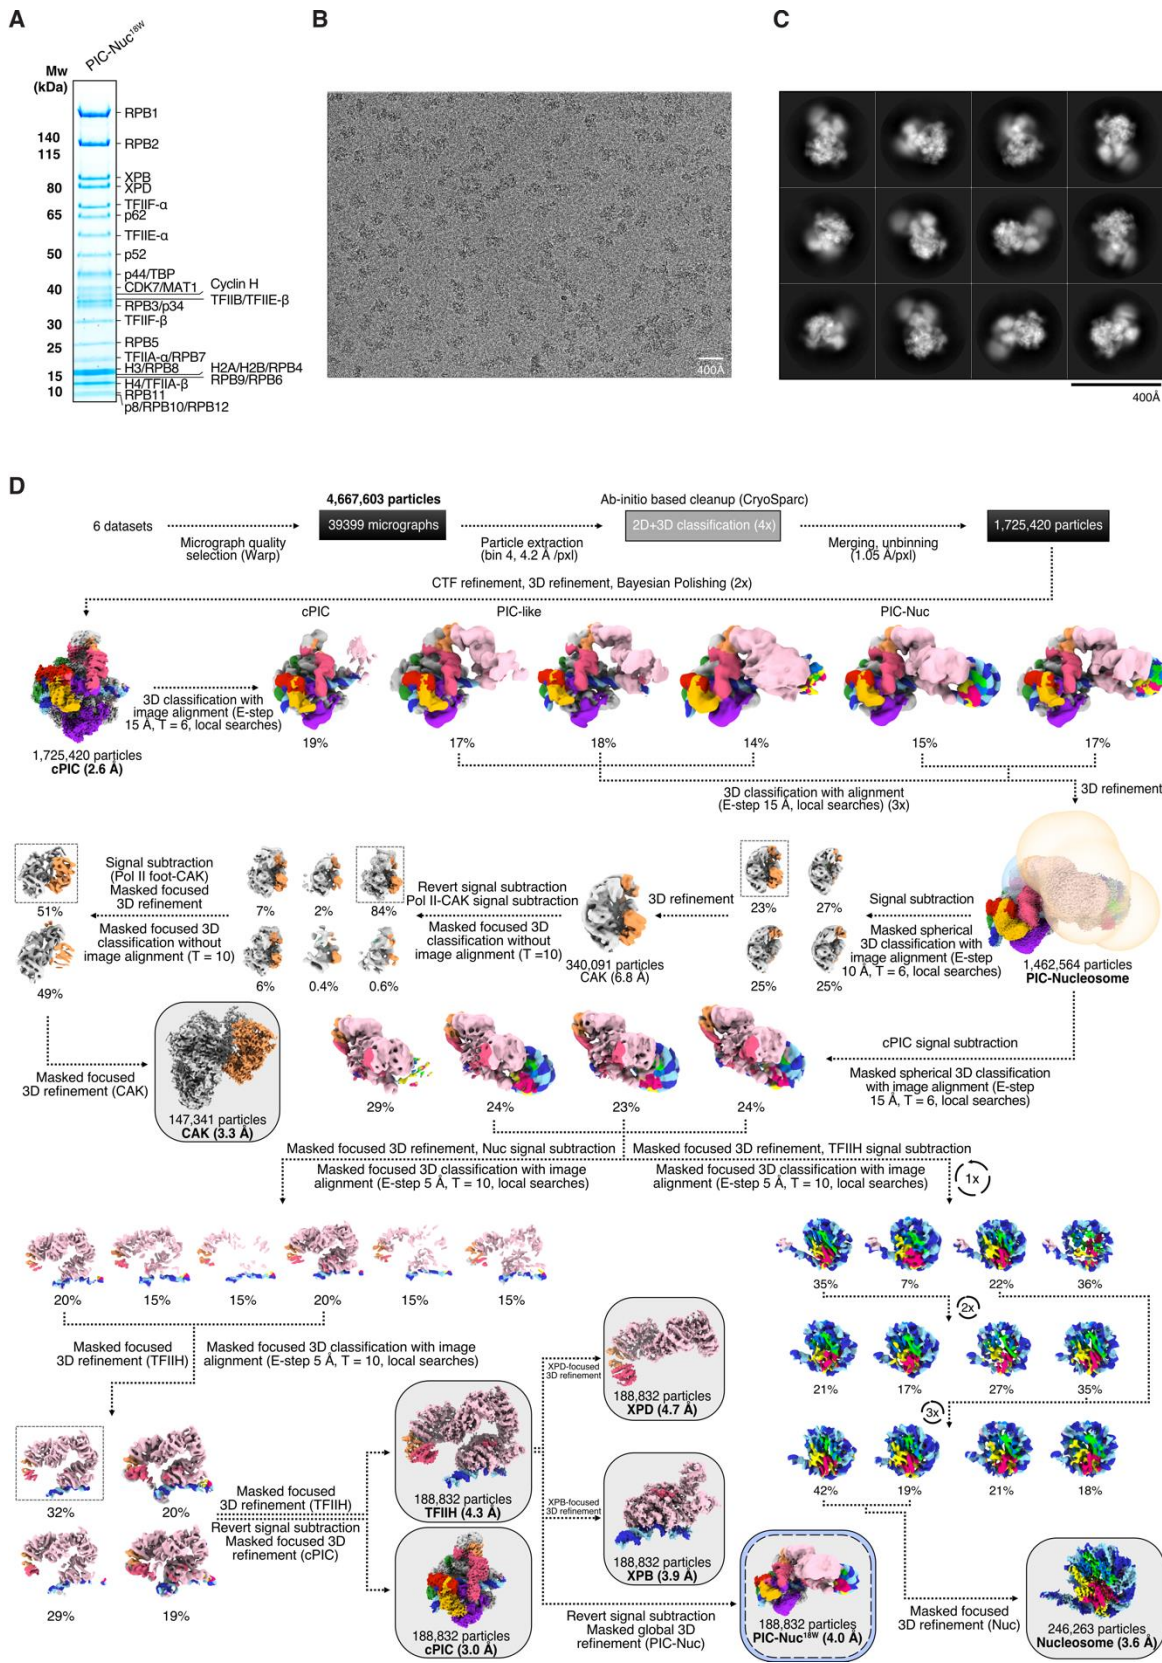

**Figure S1. Sample preparation and cryo-EM processing analysis of PIC-Nucleosome<sup>18W</sup>, Related to Figure 2.**

**(A)** Sucrose gradient fraction used for cryo-EM sample preparation (analyzed by SDS-PAGE). Molecular weight is described on the left side of the gel and assembly components on the right side.

**(B)** Exemplary cryo-EM micrograph. A scale bar is provided at the bottom right of the figure.

**(C)** Representative 2D class averages depicting mammalian PIC-nucleosome<sup>18W</sup>. Scale bar is placed at the bottom right of the figure.

**(D)** Processing classification strategy employed to sort out particles and for structure determination of PIC-Nuc<sup>18W</sup>. Each step of the tree is described on the diagram and the reported resolutions are shown under the respective cryo-EM maps. Final maps used for model building are located within grey boxes, whereas consensus refinements are enclosed in grey-blue boxes.

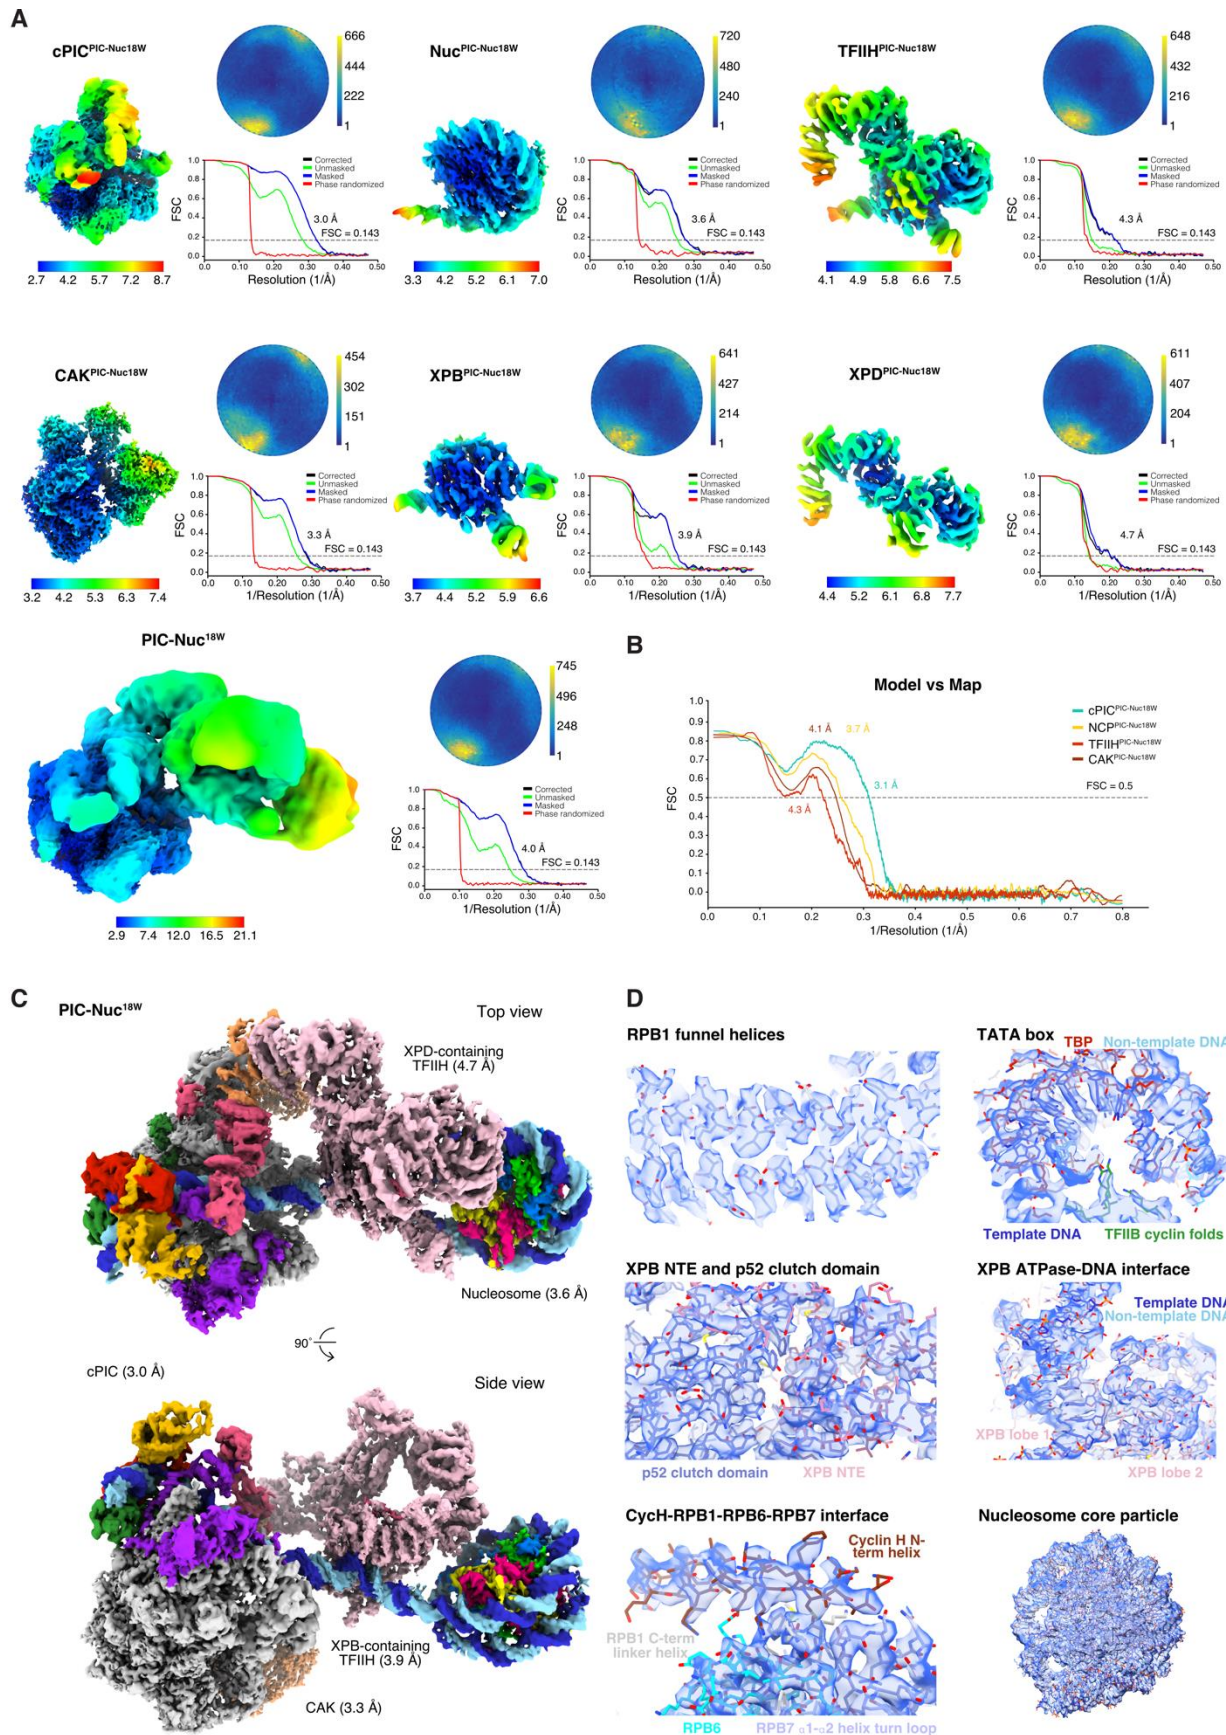

**Figure S2. Map quality assessment of the PIC-nucleosome<sup>18W</sup> structure, Related to Figure 2.**

**(A)** Focused refinements and overall maps filtered and colored by estimated local resolution, shown as top views. The superscript typography of each map is used to differentiate it from the ones shown in **Figure S5**. Their angular distributions and resolution (following the FSC 0.143 cut-off criterion) are provided on the right side of each map.

**(B)** Model-map correlation between the individual focused refined maps, used for model building, and the respective built atomic models. Resolution following the FSC 0.5 cut-off criterion is marked with a dashed line.

**(C)** Composite maps showing individual local refinements in distinct views for PIC-Nuc<sup>18W</sup>. The different protein and DNA components are colored according to the colors used in their structural models, depicted in **Figure 2B**.

**(D)** Cryo-EM density maps (shown in blue surface) fitted to the corresponding region of the modelled structures.



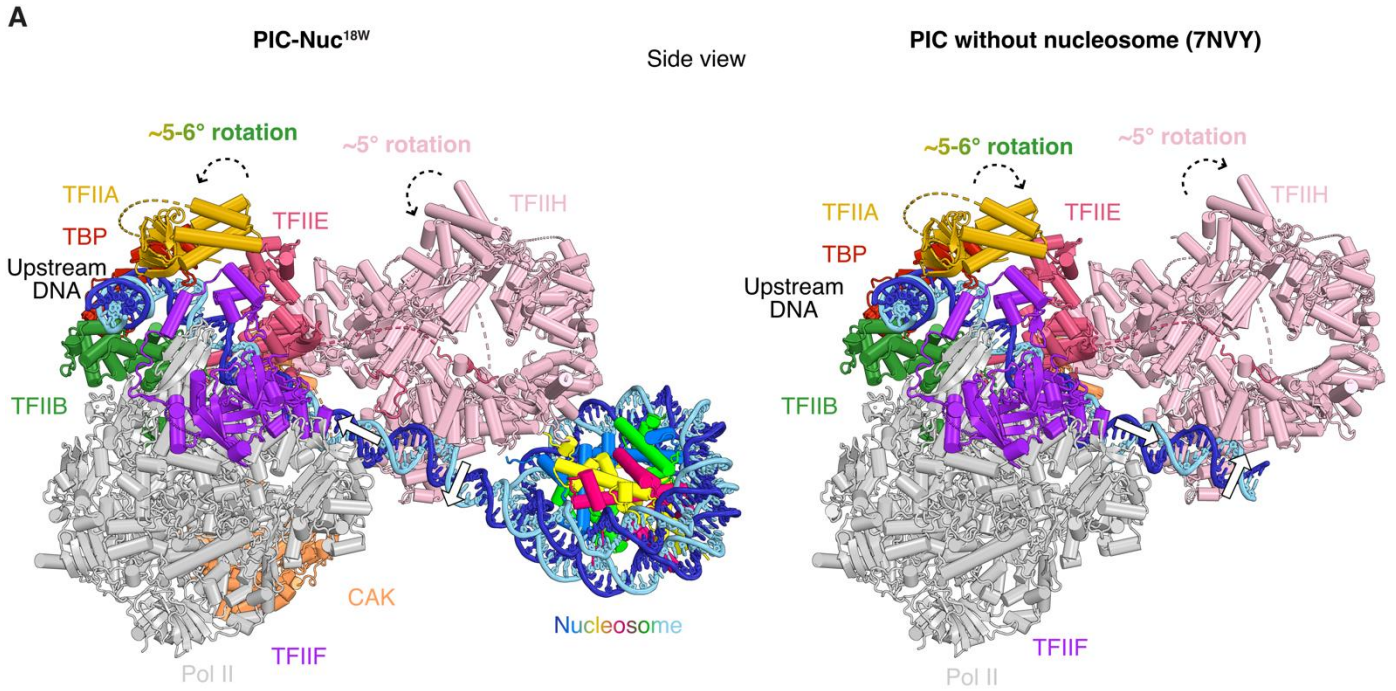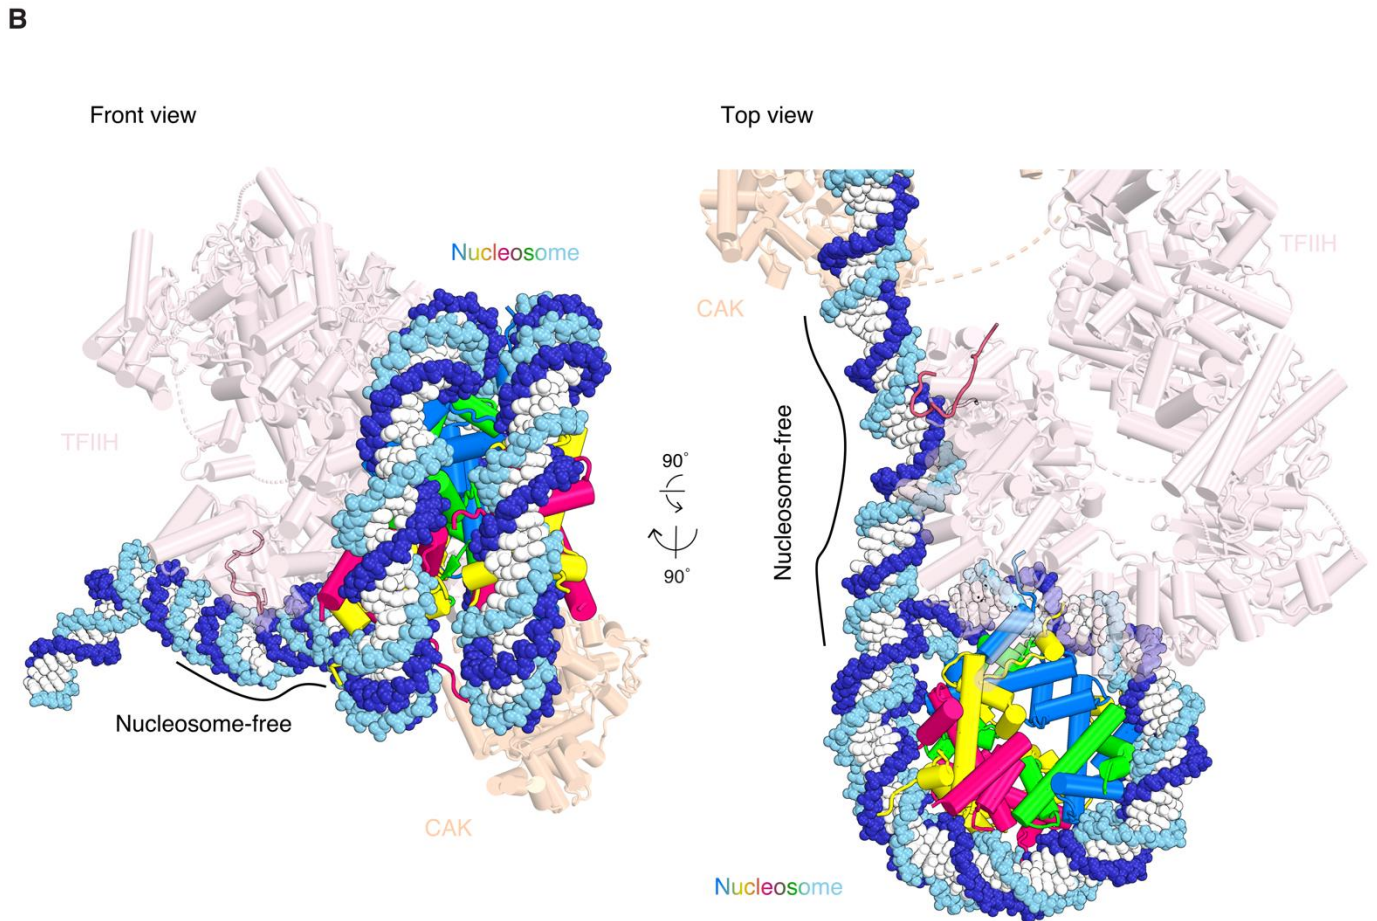

**Figure S3. Downstream DNA is free for TFIID binding in PIC-Nuc<sup>18W</sup> and mammalian PIC without nucleosome, Related to Figure 3.**

**(A)** Comparison of PIC-Nuc<sup>18W</sup> (left panel) with PIC without nucleosome (right panel) (PDB: 7NVY<sup>1</sup>) in side view. PIC is found in its canonical conformation, and only minor movements in the upstream complex were observed. The downstream DNA region is slightly bent when compared to the structure of the nucleosome-free PIC (white arrow). Arrowheads indicate the local motion of different PIC subunits.

**(B)** Front view and top close-up view of TFIID-Nuc<sup>18W</sup>. TFIID binds downstream DNA when the nucleosome is located at a distal position to the promoter region. Nucleosomes are shown in sphere representation and TFIID in transparent cartoon representation. Solid lines denote nucleosome-free DNA.

Superimposition of models was performed by aligning on Pol II. Color of the different components is denoted adjacent to them.

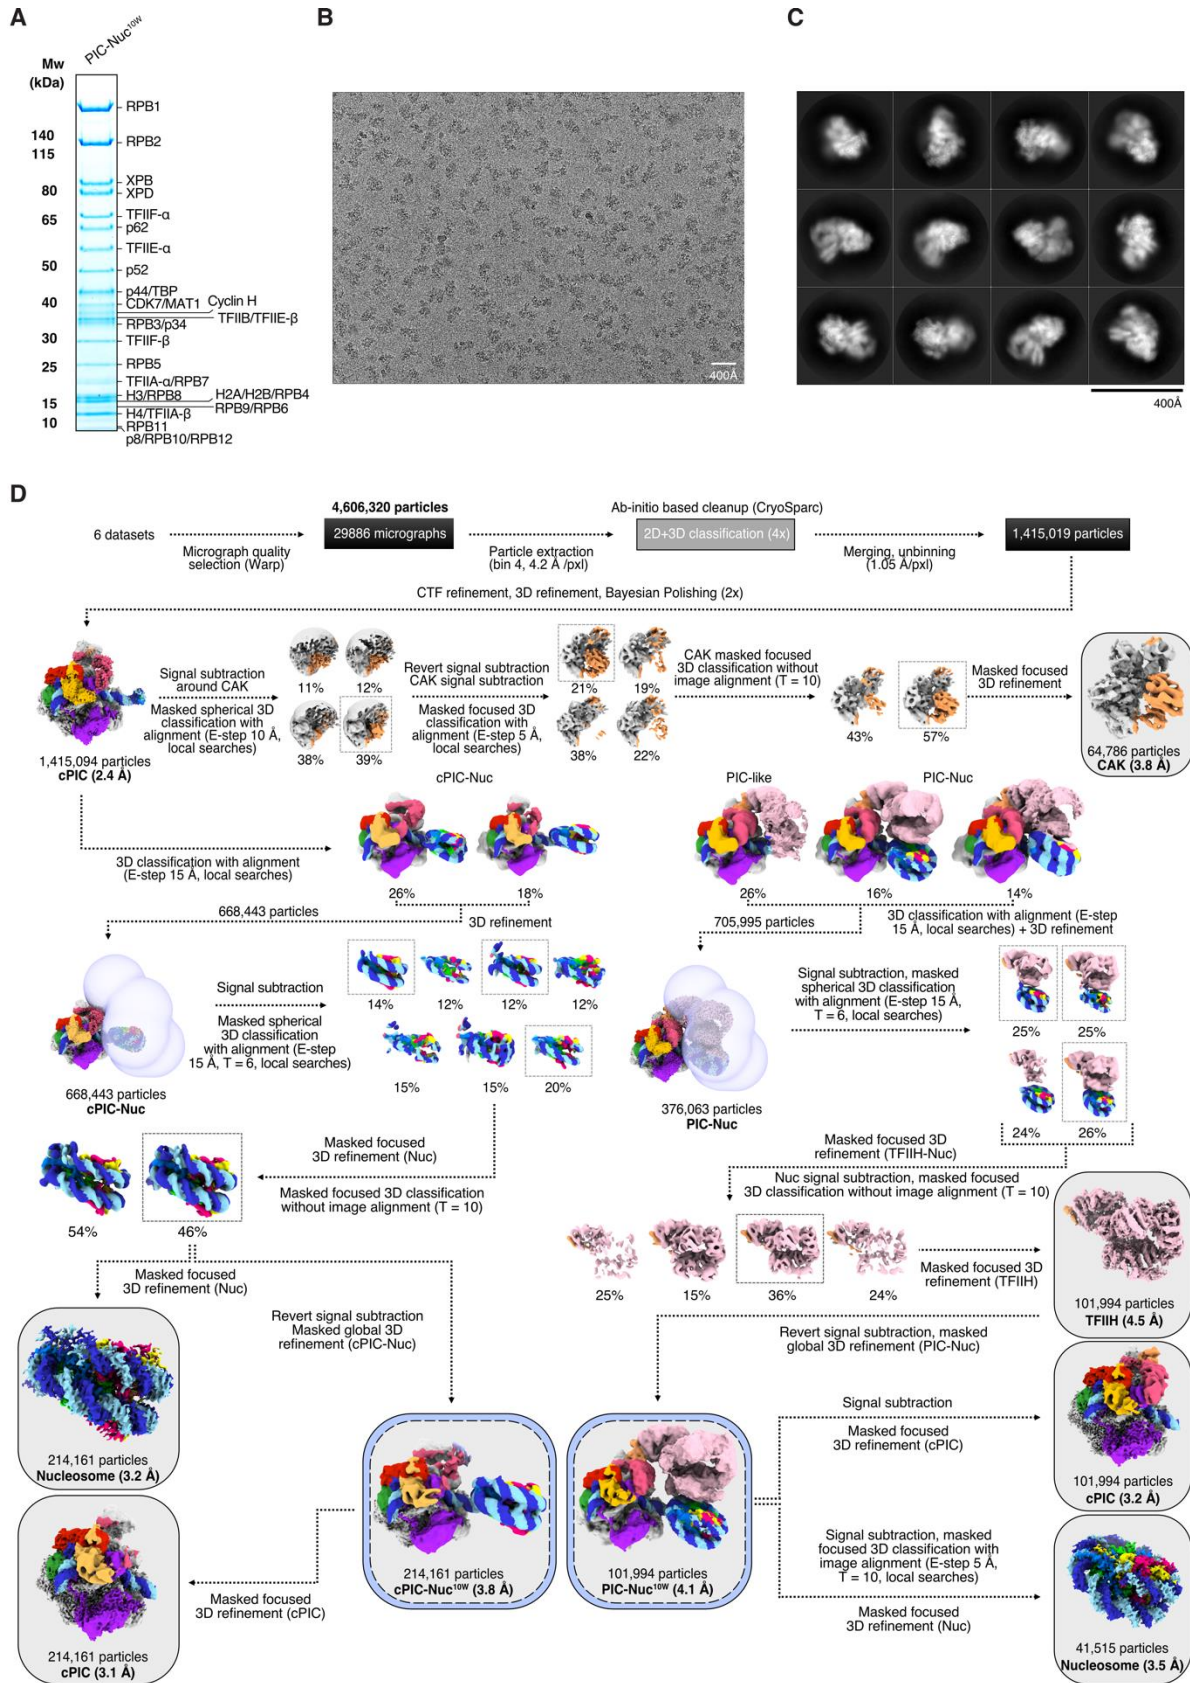



**Figure S4. Sample preparation and cryo-EM processing analysis of PIC-nucleosome<sup>10W</sup>, Related to Figure 2.**

**(A)** Sucrose gradient fraction used for cryo-EM sample preparation (analyzed by SDS-PAGE). Molecular weight is described on the left side of the gel and assembly components on the right side.

**(B)** Exemplary cryo-EM micrograph. A scale bar is provided at the bottom right of the figure.

**(C)** Representative 2D class averages depicting mammalian PIC-nucleosome<sup>10W</sup>. Scale bar is placed at the bottom right of the figure.

**(D)** Processing classification strategy employed to sort out particles and for structure determination of PIC-Nuc<sup>10W</sup>. Each step of the tree is described on the diagram and the reported resolutions are shown under the respective cryo-EM maps. Final maps used for model building are located within grey boxes, whereas consensus refinements are enclosed in grey-blue boxes.

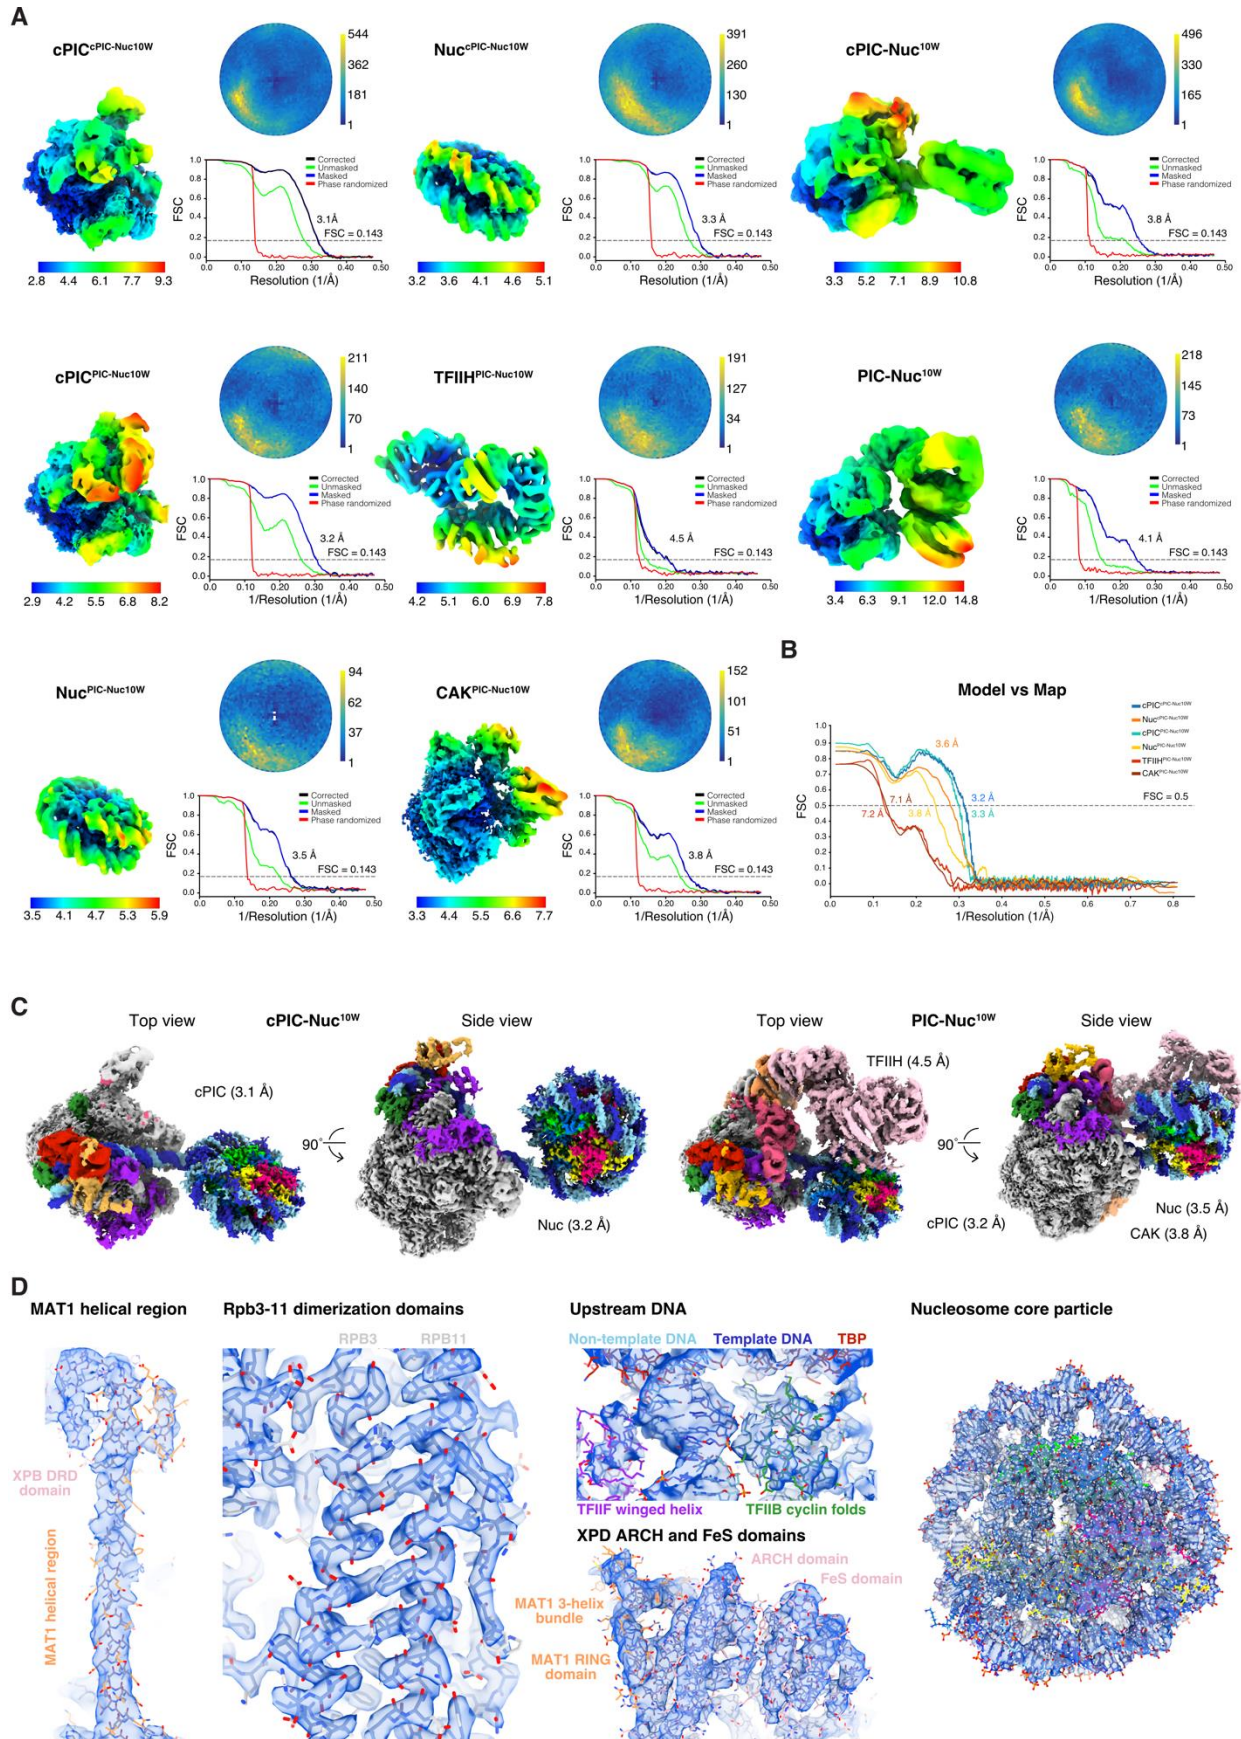

**Figure S5. Map quality assessment of the PIC-nucleosome<sup>10W</sup> structure, Related to Figure 2.**

**(A)** Focused refinements and overall maps filtered and colored by estimated local resolution, shown as top views. The superscript typography of each map indicates whether those particles contained TFIID. Their angular distributions and resolution (following the FSC 0.143 cut-off criterion) are provided on the right side of each map.



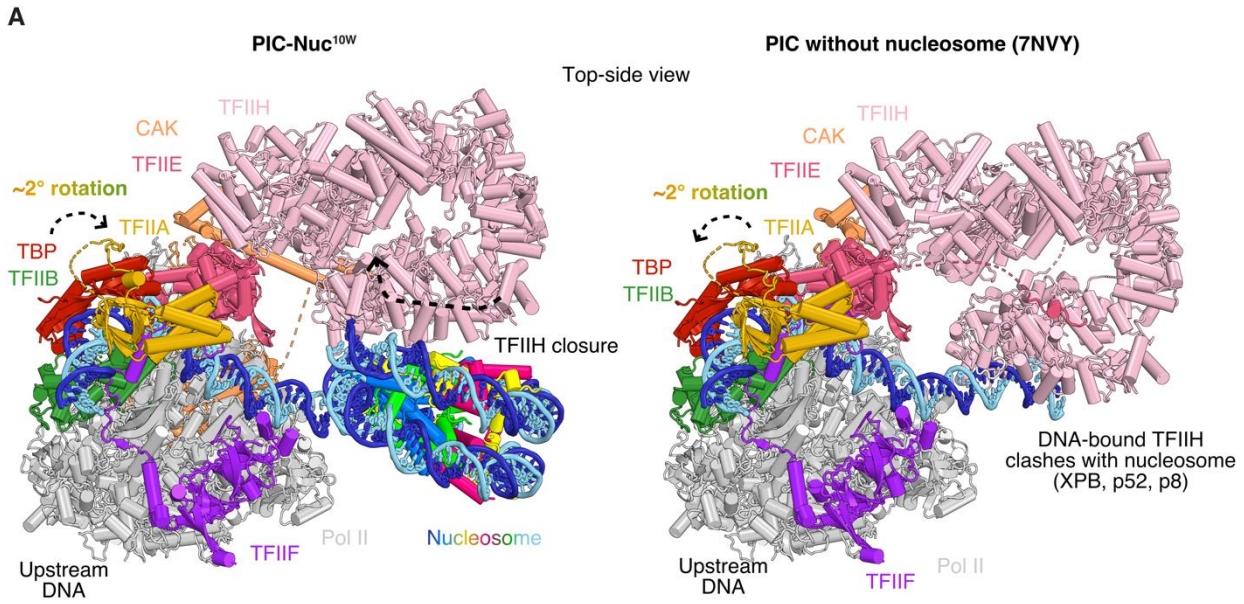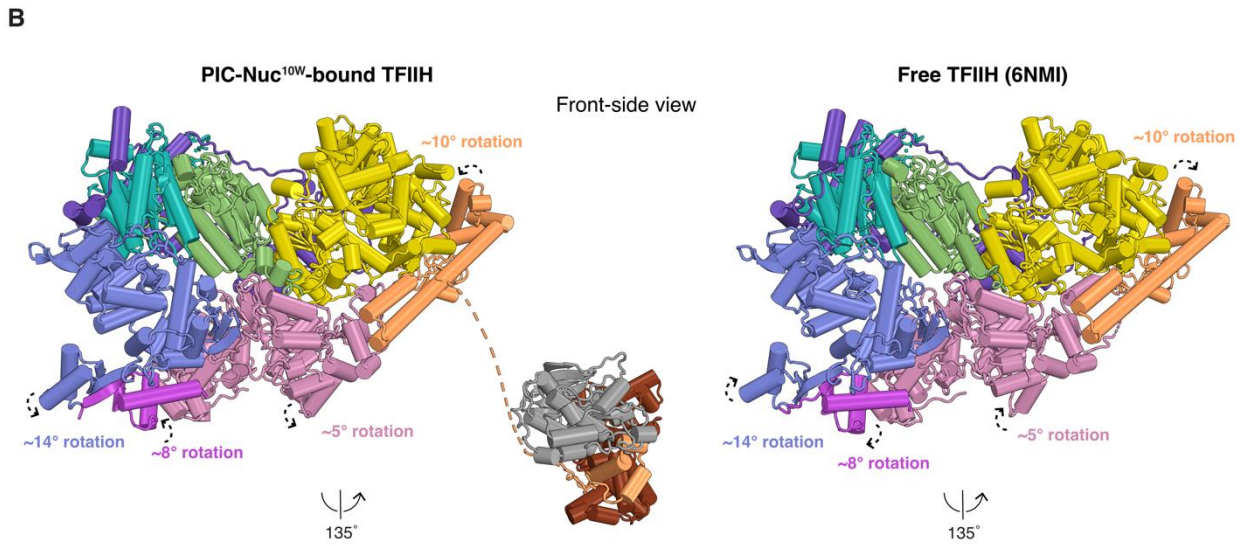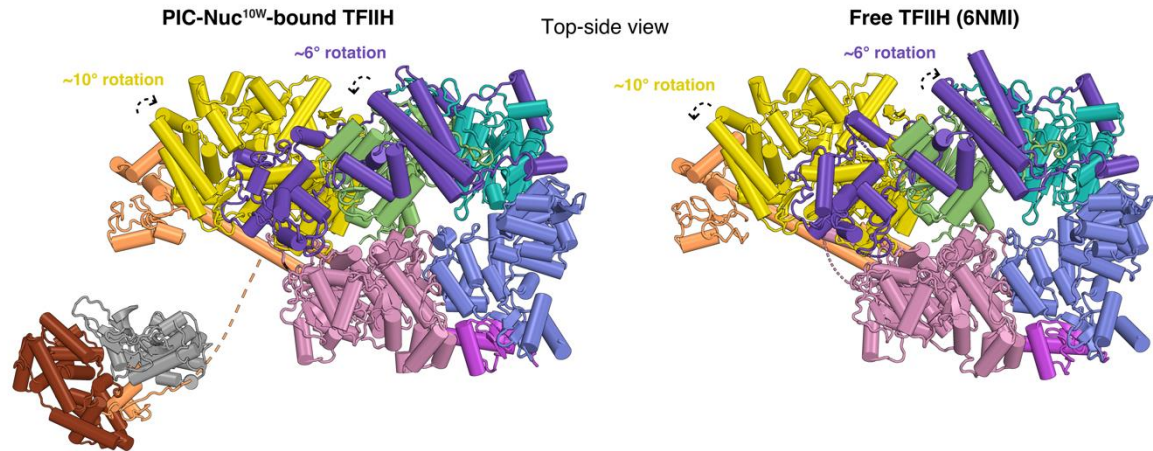

■ Non-template 
 ■ Template 
 ■ XPB 
 ■ p52 
 ■ p8 
 ■ p34 
 ■ p62 
 ■ p44 
 ■ XPD 
 ■ MAT1 
 ■ CDK7 
 ■ Cych



**Figure S6. Comparison of PIC-Nuc<sup>10W</sup> and PIC-Nuc<sup>10W</sup>-bound TFIIH with previously reported structures without the nucleosome, Related to Figure 3 and 4.**

**(A)** Comparison of PIC-nucleosome<sup>10W</sup> on a previously reported nucleosome-free PIC structure (PDB: 7NVY<sup>1</sup>) in top-side view. TFIIH now adopts a closed conformation due to the presence of the nucleosome at the region where XPB normally engages free DNA. Arrowheads on TFIIH indicate the closure of TFIIH. Superimposition of the models was performed by aligning on Pol II. Color of the different components is denoted adjacent to them.

**(B)** Comparison of TFIIH from PIC-Nuc<sup>10W</sup> (PIC-Nuc<sup>10W</sup>) (left panel) with free TFIIH (right panel) (PDB: 6NMI<sup>2</sup>) in different views. TFIIH adopts different conformations due to the different position of the nucleosome. Arrowheads indicate the local motion of TFIIH subunits. Superimposition of the models was performed by aligning on TFIIH. TFIIH is depicted in cartoon representation and the color of the different components is denoted exclusively at the bottom legend.

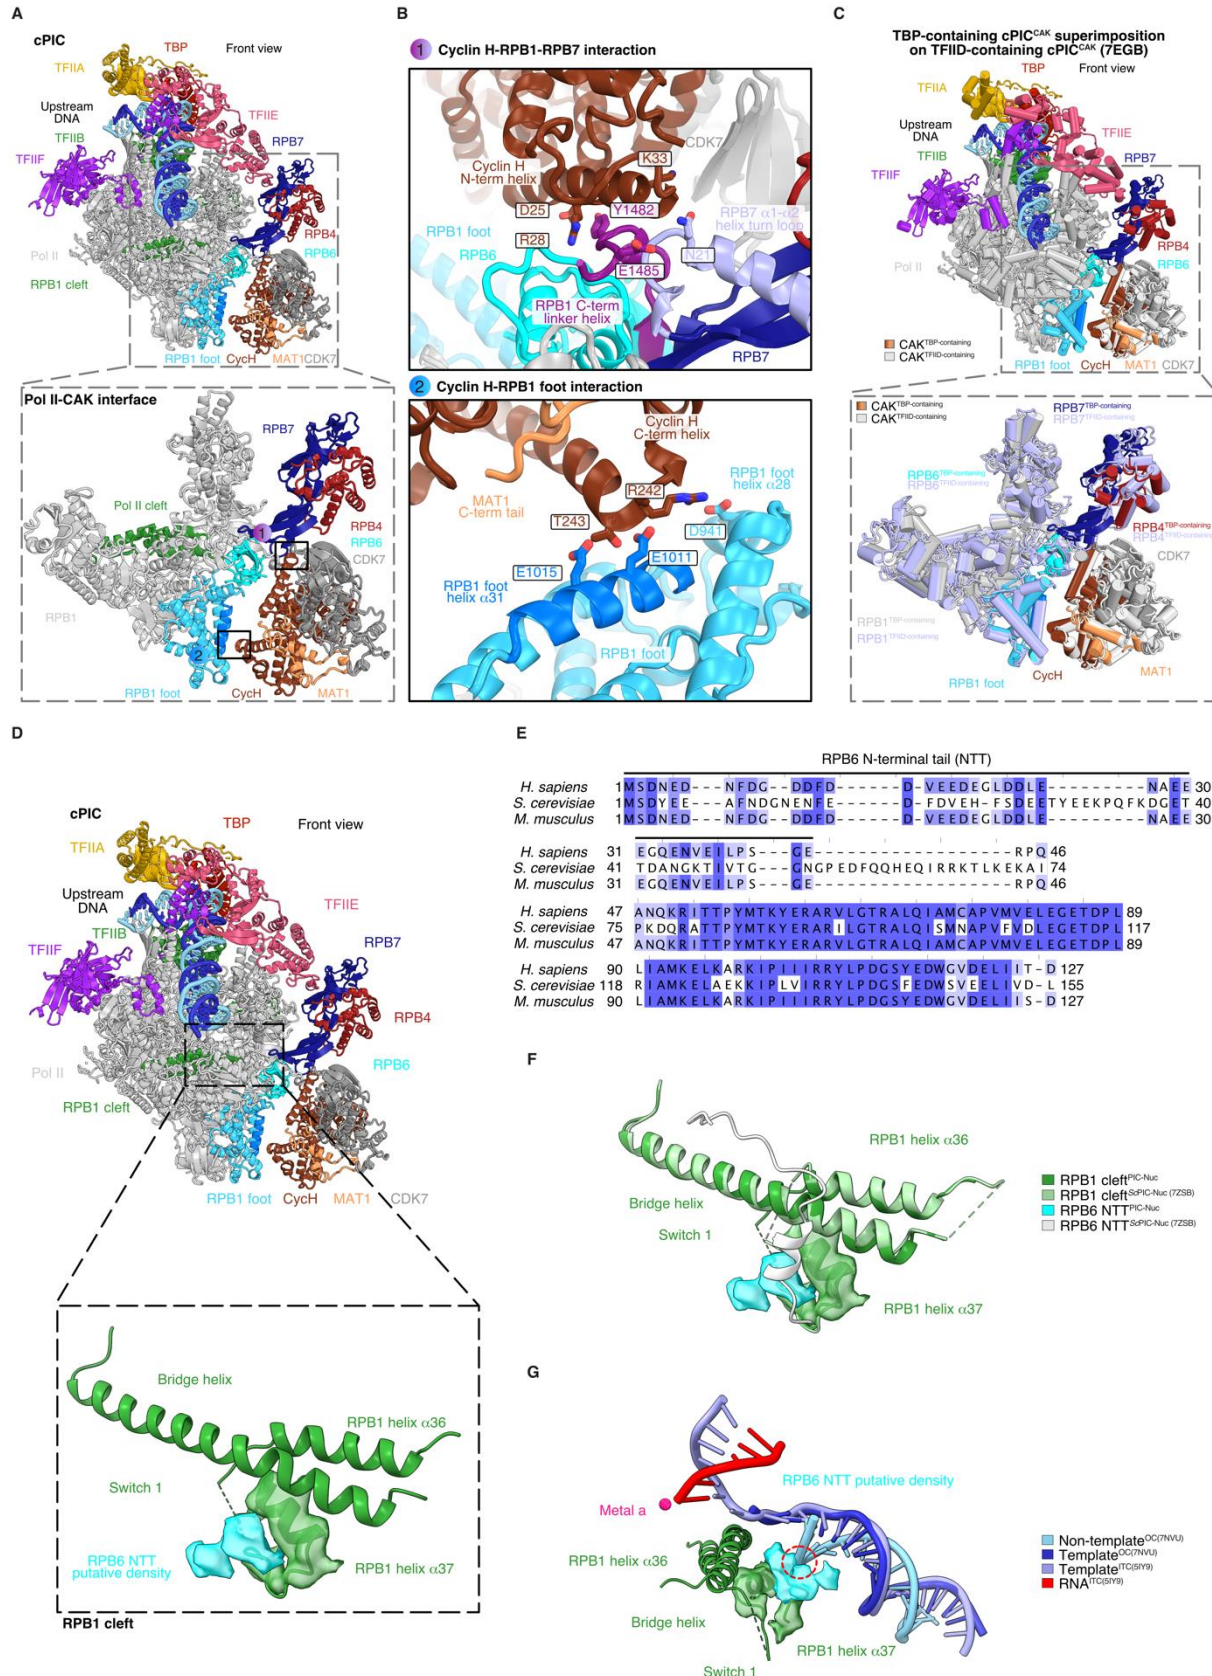

**Figure S7. A PIC-bound nucleosome stabilizes TFIIH CAK and favors ordering of RPB6 NTT, Related to Figure 2.**

**(A)** Enlarged view of the Pol II-CAK interaction interface, shown in front view and within a dashed box. CAK engages via two contact points between the Pol II stalk (RPB4/RPB7) and foot (RPB1) via its subunit Cyclin H. TFIIH and the nucleosome are omitted to facilitate visualization.

**(B)** Cyclin H interacts with Pol II through its N- and C-terminal regions. The N-terminal region contacts electrostatically both RPB1 C-terminus linker helix and RPB7  $\alpha 1$ - $\alpha 2$  loop, whereas its C-terminus interacts with RPB1 foot helices  $\alpha 28$  and  $\alpha 31$ . Interacting residues are enclosed in rectangular boxes.

**(C)** Comparison of CAK between TBP-containing (this study) and TFIIID-containing PIC complexes (PDB: 7EGB<sup>3</sup>), shown in front view within a dashed box. There are no perceivable differences between these complexes, except for inherent protein local motion.

**(D)** Magnification of the Pol II cleft, shown in front view and within a dashed box. Putative RPB6 NTT density locates above the helix  $\alpha 31$  of Pol II cleft. TFIIH and the nucleosome are omitted to facilitate visualization.

**(E)** Protein sequence alignment of RPB6 orthologs in *H. sapiens*, *S. cerevisiae* and *M. musculus*. The alignment was performed with Jalview 2.11.2.4<sup>4</sup> using the T-Coffee algorithm. The RPB6 NTT is denoted with a solid black line. The color code indicates the conservation scoring across different organisms.

Overlay of the putative RPB6 NTT density of mammalian PIC-nucleosome (this study) on a yeast PIC-nucleosome complex (PDB: 7ZSB<sup>5</sup>) **(F)**, a nucleosome-free mammalian PIC complex with opened promoter DNA (PDB: 7NVU<sup>1</sup>) and a human PIC-initial transcribing complex (ITC, PDB: 5IY9<sup>6</sup>) **(G)**. The putative NTT clashes with the loaded DNA of opened promoter DNA complexes, suggesting the inhibitory function of the nucleosome favors the ordering of such tail.

Colors of the different components in all panels is denoted adjacent to their corresponding subunits and by legends. Superimposition of models shown was performed by aligning on Pol II.

A

**cPIC-Nuc<sup>10W</sup> superimposition on the open promoter complex (7NVU)**

Back-side view

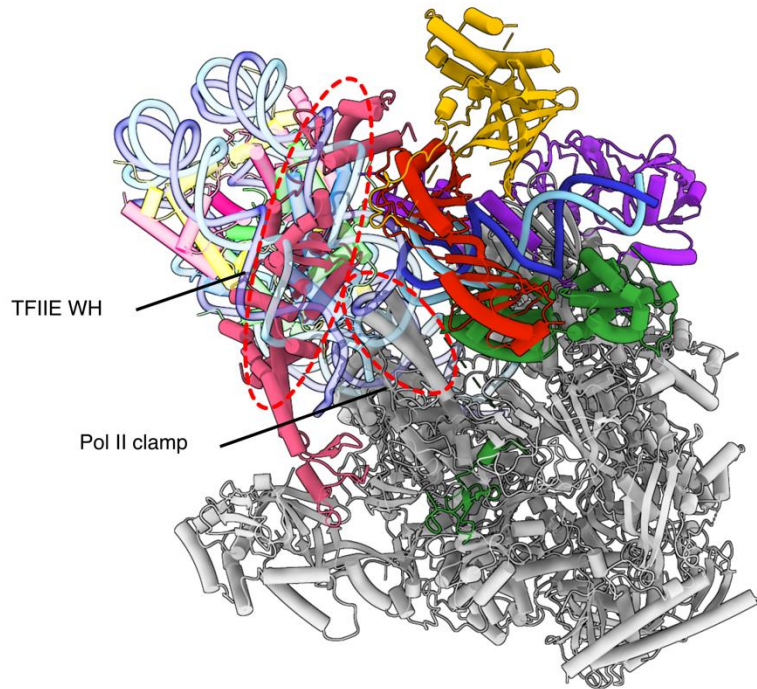

B

**cPIC-Nuc<sup>18W</sup> superimposition on the open promoter complex (7NVU)**

Back-side view

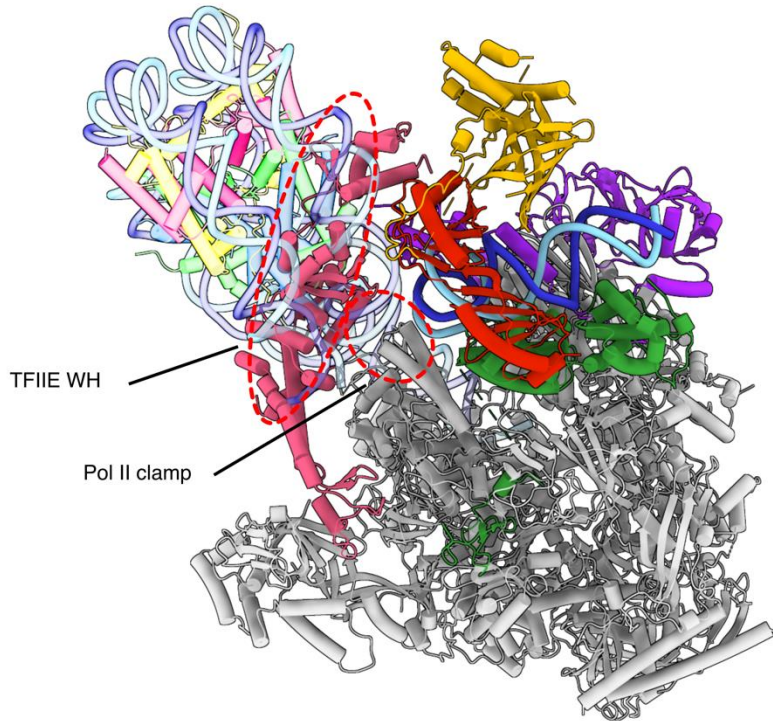

■ Non-template ■ Template ■ TBP ■ TFIIA ■ TFIIB ■ TFIIF ■ TFIIE ■ H2A ■ H2B ■ H3 ■ H4



**Figure S8. Core PIC-nucleosome complexes are incompatible with DNA opening, Related to Figure 1 and 2.**

**(A) (B)** Modelling of our PIC-nucleosome structures missing TFIID (cPIC) on an open promoter complex (OC, PDB: 7NVU<sup>1</sup>), shown in back-side view. TFIID-independent spontaneous promoter opening would not be compatible on a nucleosomal template since the nucleosome would clash with the Pol II clamp and TFIIE winged helix (WH). Superimposition of the models was performed by aligning on Pol II and the DNA. Steric clashes are indicated with arrowheads and red dashed ovals, proteins are depicted in cartoon representation and the color of the different components is denoted exclusively at the bottom legend.

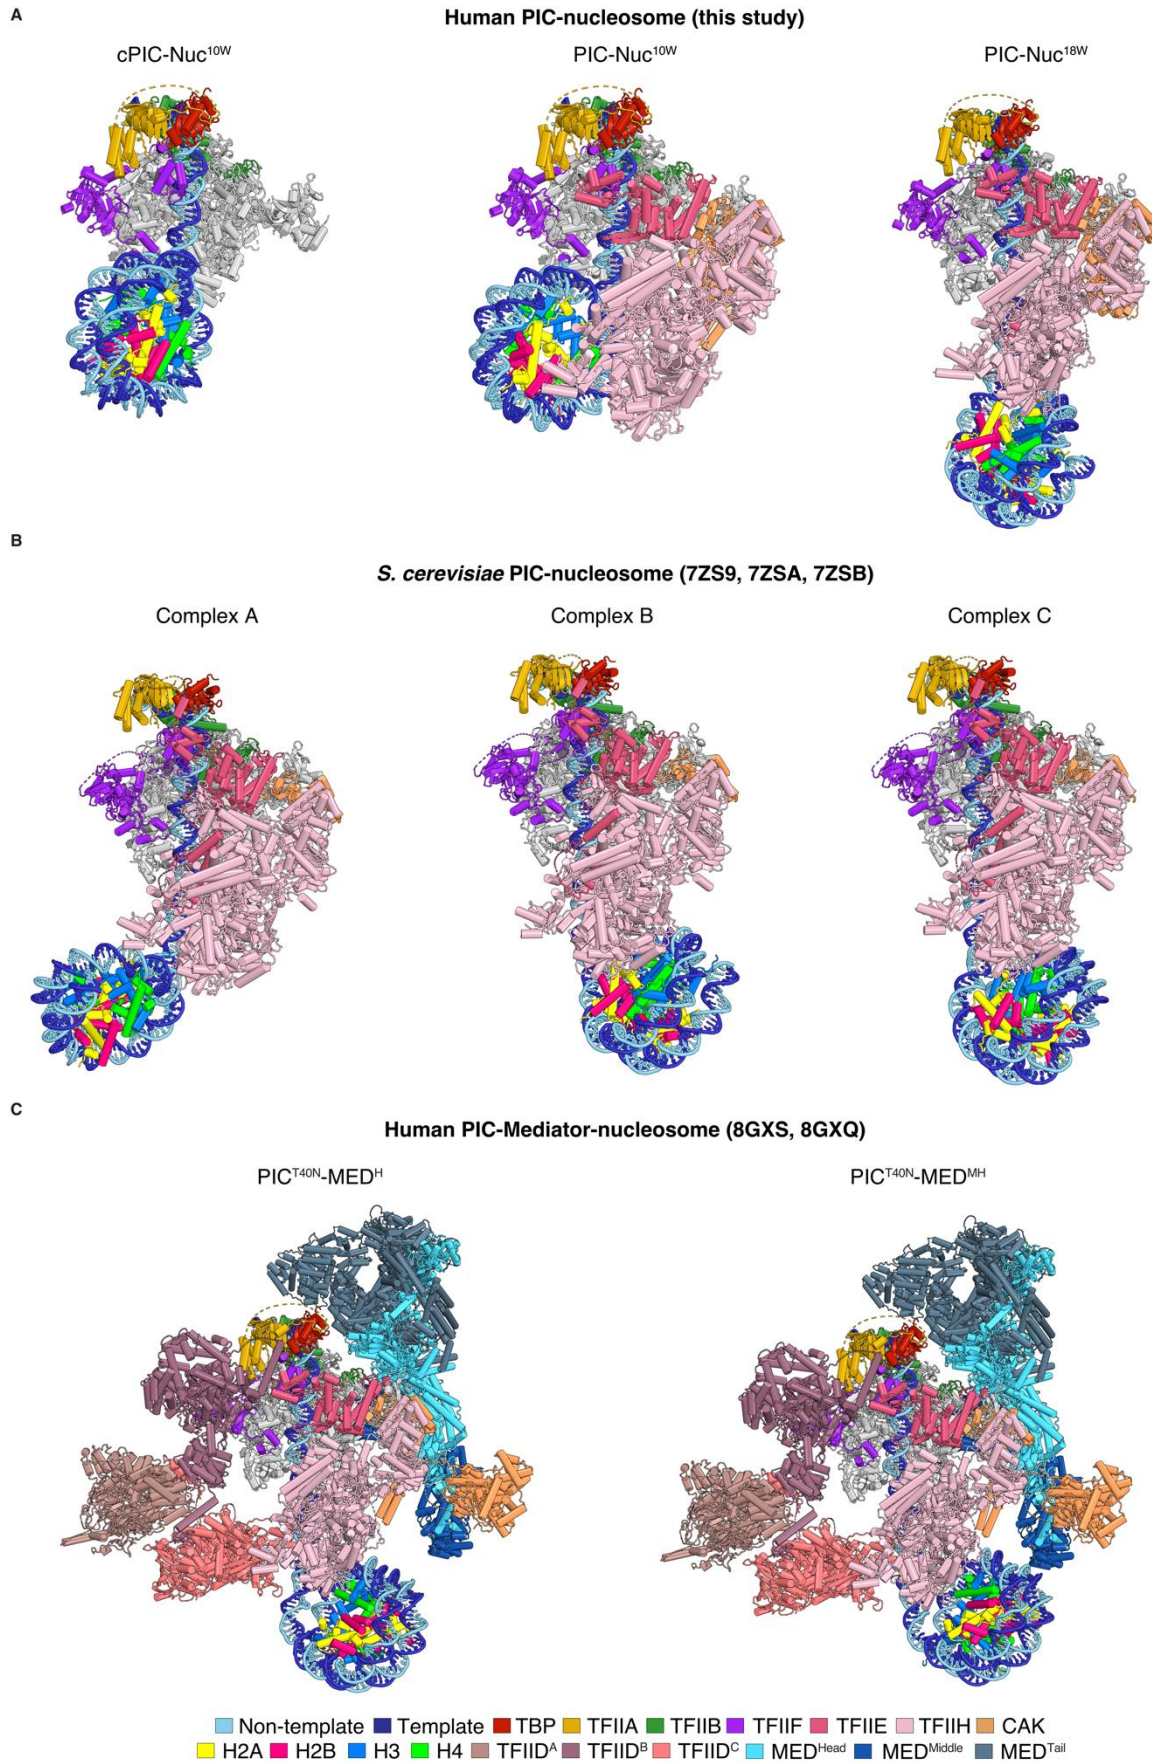

**Figure S9. Comparison of human and yeast PIC-nucleosome complexes, related to Figure 7.**

Models of the PIC-nucleosome complexes determined in **(A)** this study, **(B)** in yeast (PDB: 7ZS9, 7ZSA, 7ZSB<sup>5</sup>) and **(C)** in human (PDB: 8GXS, 8GXQ<sup>7</sup>) Superimposition of the models was performed by aligning on Pol II and the representations shown in the same view. Color of the different components is denoted exclusively at the bottom legend.

**Table S1. Cryo-EM data acquisition, processing and refinement statistics, Related to Figure 2.**

| <b>Model name</b>                         | cPIC-nucleosome <sup>10W</sup> | PIC-nucleosome <sup>10W</sup>         | PIC-nucleosome <sup>18W</sup>        |
|-------------------------------------------|--------------------------------|---------------------------------------|--------------------------------------|
| PDB code                                  | (PDB: 8BZ1)                    | (PDB: 8BYQ)                           | (PDB: 8BVW)                          |
| Map code                                  | (EMDB: EMD-16335)              | (EMDB: EMD-16331)                     | (EMDB: EMD-16274)                    |
| <b>Data collection and processing</b>     |                                |                                       |                                      |
| Magnification                             | 81,000x                        | 81,000x                               | 81,000x                              |
| Voltage (kV)                              | 300                            | 300                                   | 300                                  |
| Electron exposure (e-/Å <sup>2</sup> )    | 50.45                          | 50.45                                 | 41.58                                |
| Defocus range (µm)                        | 0.6 – 1.3                      | 0.6 – 1.3                             | 0.5 – 1.5                            |
| Pixel size (Å)                            | 1.05                           | 1.05                                  | 1.05                                 |
| Initial particle images (no.)             | 4,606,320                      | 4,606,320                             | 4,667,603                            |
| Symmetry imposed                          | C1                             | C1                                    | C1                                   |
| Final particle images (no.)               | 214,161                        | 101,994                               | 188,832                              |
| Map resolution (Å) at FSC = 0-143         | 3.8                            | 4.1                                   | 4.0                                  |
| Map resolution range (Å)                  | 2.8 – 7.7                      | 2.9 – 8.2                             | 2.7 – 8.7                            |
| Map sharpening B factor (Å <sup>2</sup> ) | -90                            | -150                                  | -114                                 |
| <b>Refinement</b>                         |                                |                                       |                                      |
| Initial models used (PDB code)            | 7NVS, 7OHC                     | 7NVS, 7OHC, 6NMI, 6XBZ, 7EGB          | 7NVS, 7OHC, 7ZSB, 7NVW, 6XBZ, 7EGB   |
| <b>Model composition</b>                  |                                |                                       |                                      |
| Non-hydrogen atoms                        | 53411                          | 86010                                 | 84811                                |
| Protein residues                          | 5667                           | 9687                                  | 9510                                 |
| Nucleotides                               | 396                            | 396                                   | 412                                  |
| Ligands                                   | ZN: 9<br>MG: 1                 | ZN: 16<br>MG: 1<br>SF4: 1<br>UNK: 154 | ZN: 17<br>MG: 1<br>SF4: 1<br>UNK: 27 |
| <b>Mean B factors (Å<sup>2</sup>)</b>     |                                |                                       |                                      |
| Protein                                   | 117.33                         | 176.57                                | 125.41                               |
| Nucleotides                               | 145.93                         | 212.46                                | 212.92                               |
| Ligand                                    | 146.29                         | 223.85                                | 136.37                               |
| <b>R.m.s. deviations</b>                  |                                |                                       |                                      |
| Bond lengths (Å)                          | 0.004                          | 0.005                                 | 0.006                                |
| Bond angles (°)                           | 0.737                          | 0.860                                 | 0.896                                |
| <b>Validation</b>                         |                                |                                       |                                      |
| MolProbity score                          | 1.22                           | 1.47                                  | 1.46                                 |
| Clashscore                                | 4.46                           | 6.52                                  | 5.48                                 |
| Poor rotamers (%)                         | 0.00                           | 0.06                                  | 0.04                                 |
| <b>Ramachandran plot</b>                  |                                |                                       |                                      |
| Favored (%)                               | 98.19                          | 97.44                                 | 96.93                                |
| Allowed (%)                               | 1.81                           | 2.56                                  | 3.07                                 |
| Disallowed (%)                            | 0.00                           | 0.00                                  | 0.00                                 |

PDB: Protein Data Bank; EMD: Electron Microscopy Data Bank; FSC: Fourier Shell Correlation; R.m.s.: root-mean-square



## Supplemental references

1. Aibara, S., Schilbach, S., and Cramer, P. (2021). Structures of mammalian RNA polymerase II pre-initiation complexes. *Nature* 594, 124-128. 10.1038/s41586-021-03554-8.
2. Greber, B.J., Toso, D.B., Fang, J., and Nogales, E. (2019). The complete structure of the human TFIID core complex. *Elife* 8. 10.7554/eLife.44771.
3. Chen, X., Qi, Y., Wu, Z., Wang, X., Li, J., Zhao, D., Hou, H., Li, Y., Yu, Z., Liu, W., et al. (2021). Structural insights into preinitiation complex assembly on core promoters. *Science* 372. 10.1126/science.aba8490.
4. Waterhouse, A.M., Procter, J.B., Martin, D.M., Clamp, M., and Barton, G.J. (2009). Jalview Version 2--a multiple sequence alignment editor and analysis workbench. *Bioinformatics* 25, 1189-1191. 10.1093/bioinformatics/btp033.
5. Wang, H., Schilbach, S., Ninov, M., Urlaub, H., and Cramer, P. (2022). Structures of transcription preinitiation complex engaged with the +1 nucleosome. *Nat Struct Mol Biol*. 10.1038/s41594-022-00865-w.
6. He, Y., Yan, C., Fang, J., Inouye, C., Tjian, R., Ivanov, I., and Nogales, E. (2016). Near-atomic resolution visualization of human transcription promoter opening. *Nature* 533, 359-365. 10.1038/nature17970.
7. Chen, X., Wang, X., Liu, W., Ren, Y., Qu, X., Li, J., Yin, X., and Xu, Y. (2022). Structures of +1 nucleosome-bound PIC-Mediator complex. *Science* 378, 62-68. 10.1126/science.abn8131.
